# Supplementary material for: A nonspecific defensive compound evolves into a competition avoidance cue and a female sex pheromone
Source: PubMed Central journal article supplement — Nat Commun. 2013 Nov 15;4:2767. doi: 10.1038/ncomms3767 (PMC3868268; doi:10.1038/ncomms3767), 2013-11-15
Supplement: ncomms3767-s1.pdf [file ncomms3767-s1.pdf]

## Supplementary Information for “A nonspecific defensive compound evolves into a competition avoidance cue and a female sex pheromone”

Ingmar Weiss<sup>1</sup>, Thomas Rössler<sup>1</sup>, John Hofferberth<sup>2</sup>, Michael Brummer<sup>1</sup>, Joachim Ruther<sup>1</sup>  
and Johannes Stökl<sup>1</sup>

<sup>1</sup> University of Regensburg, Institute for Zoology, Universitätsstraße 31, 93053 Regensburg, Germany

<sup>2</sup> Department of Chemistry, Kenyon College, 312 Tomsich Hall, Gambier, OH 43022, USA

Corresponding author: Johannes Stökl, e-mail: johannes.stoekl@ur.de

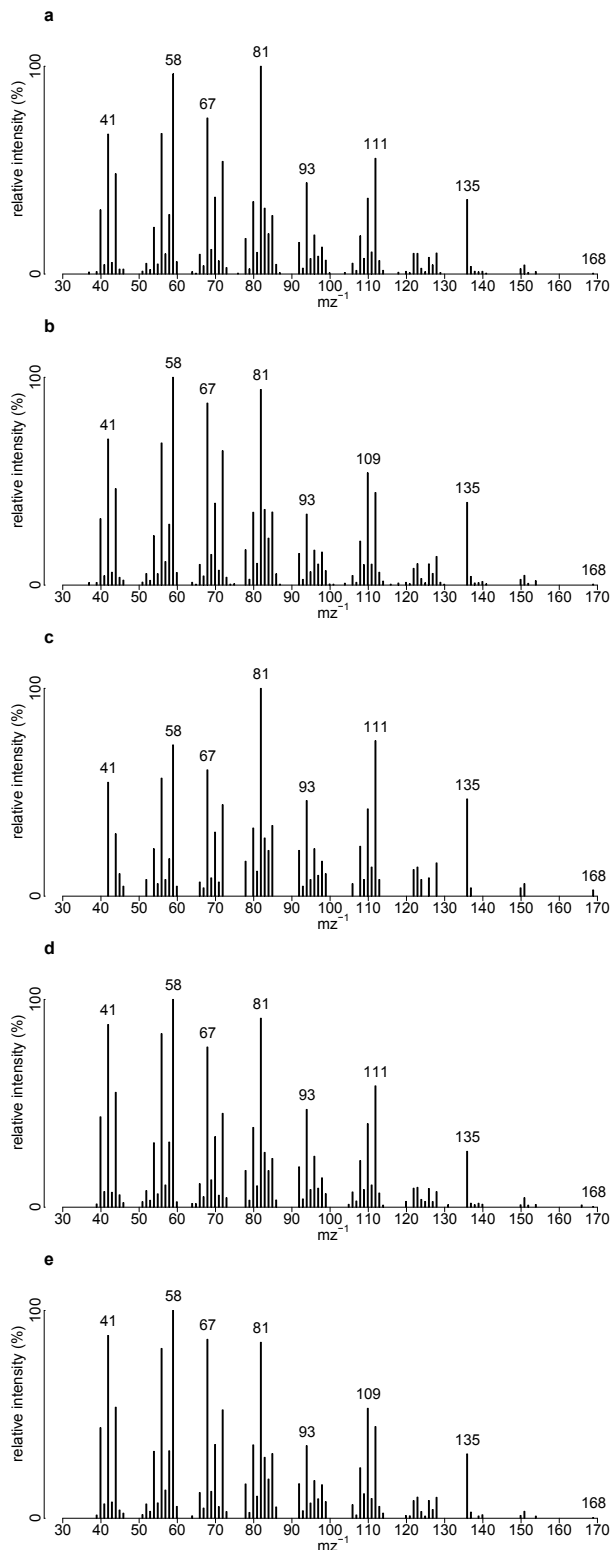

**Supplementary Figure S1: Tentative identification of p1 and p2.** Mass spectra (EI) of (a) compound p1 and (b) compound p2 from *L. heterotoma* females, (c) iridodial<sup>25</sup>, and (d) and (e) iridodials derived from (epi-)/chrysolidial.

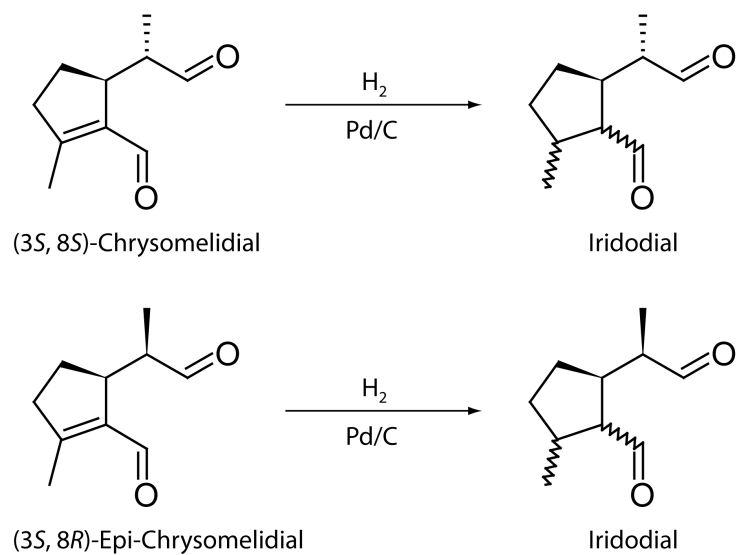

**Supplementary Figure S2: Hydrogenation of (epi-)/chrysomelidial.** Catalytic hydrogenation of (epi-)/chrysomelidial yields multiple stereoisomers of iridodial through the addition of hydrogen at the carbon-carbon double bond.

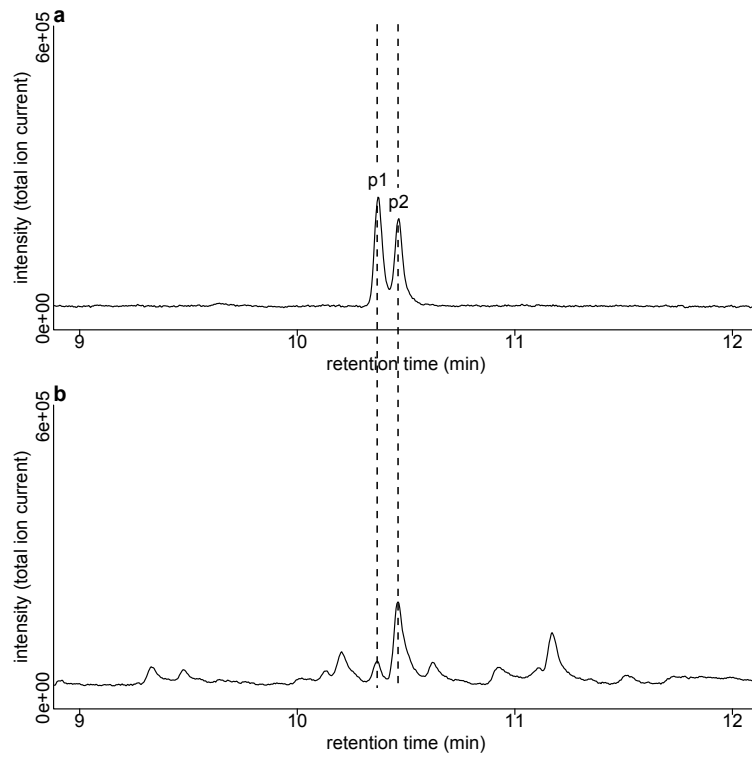

**Supplementary Figure S3: Tentative identification of p1 and p2.** Total ion current chromatograms on a non-polar column of (a) the female sex pheromone of *L. heterotoma* and (b) the iridoidials derived from (epi-)/chrysomelidial.

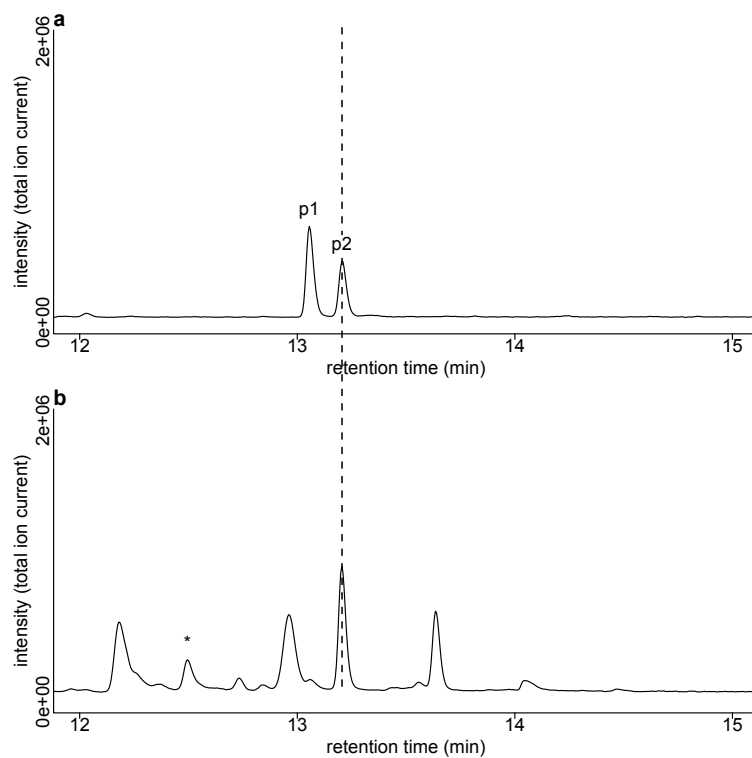

**Supplementary Figure S4: Tentative identification of p1 and p2.** Total ion current chromatograms on a cyclodextrin (Beta DEX 225) column of (a) the female sex pheromone of *L. heterotoma* and (b) the iridoidials derived from (epi-)/chrysomelidial. The asterisk denotes the compound that coeluted with p1 on the non-polar column.

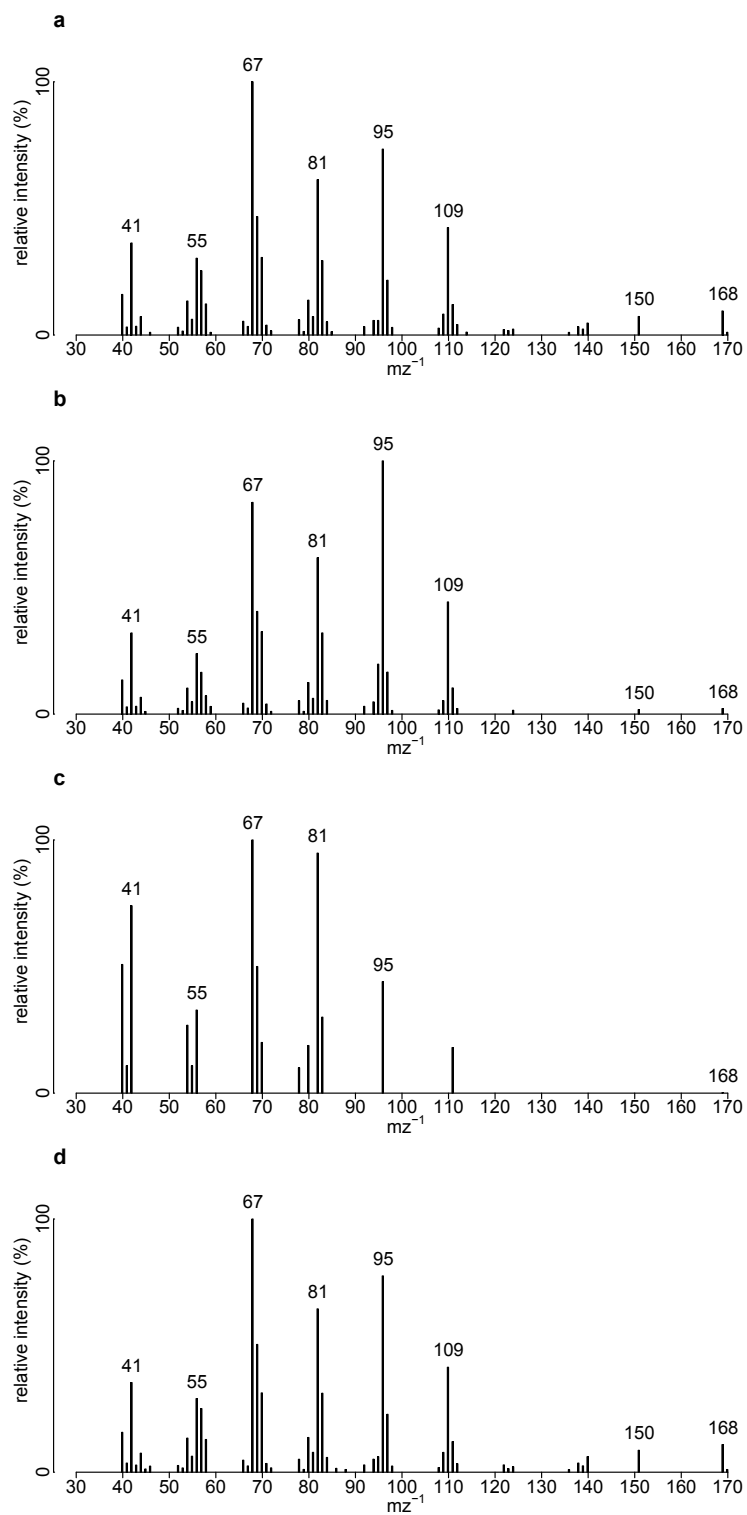

**Supplementary Figure S5: Tentative identification of p7.** Mass spectra (EI) of (a) compound p7 from *L. heterotoma* females, (b) synth. (-)-iridomyrmecin, (c) a trans-fused iridomyrmecin<sup>26</sup> and (d) the minor product in the synthesis of (-)-iridomyrmecin.

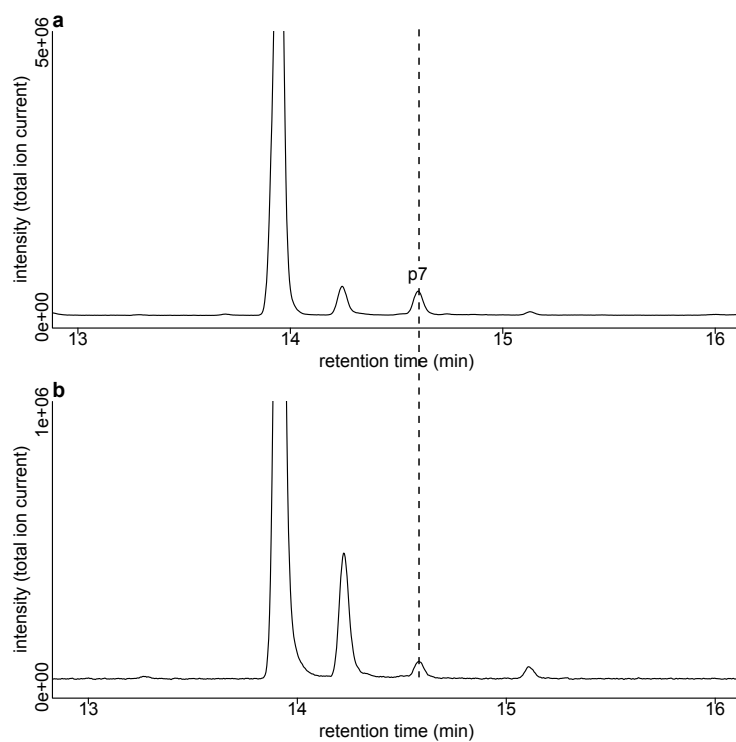

**Supplementary Figure S6: Tentative identification of p7.** Total ion current chromatograms on a non-polar column of (a) an extract of virgin *L. heterotoma* females and (b) the synthetic sample of (-)-iridomyrmecin with minor compounds.

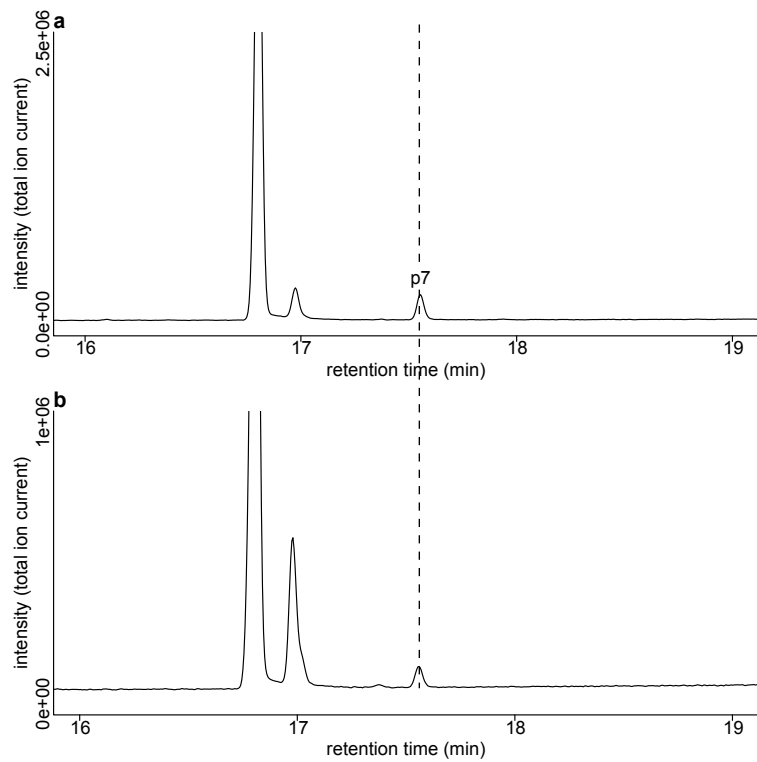

**Supplementary Figure S7: Tentative identification of p7.** Total ion current chromatograms on a cyclodextrin (Gamma DEX 120) column of (a) an extract of virgin *L. heterotoma* females and (b) the synthetic sample of (-)-iridomyrmecin with minor compounds.

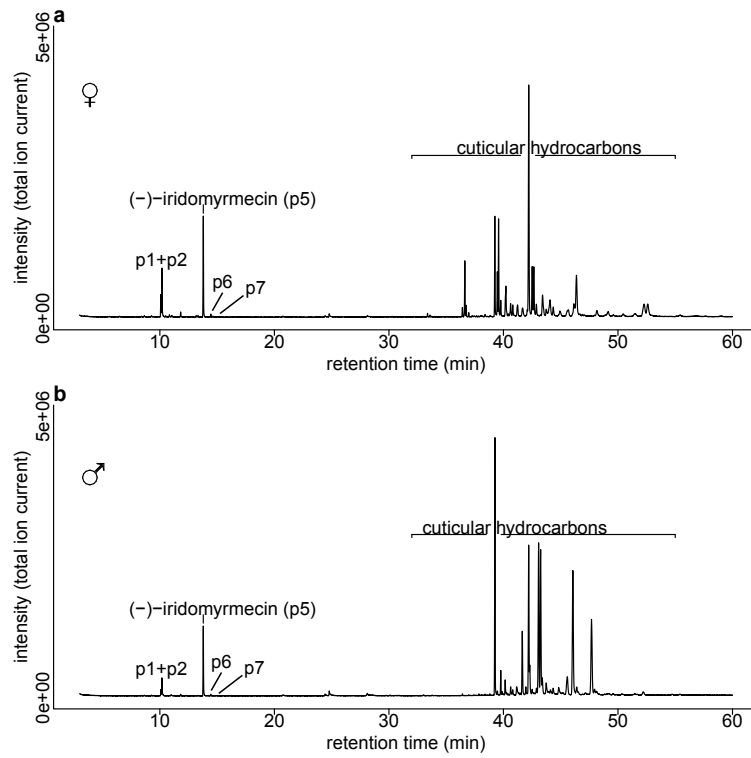

**Supplementary Figure S8: Chemical compounds produced by *L. boulandi*.** Total ion current chromatograms of an extract of (a) virgin *L. boulandi* females and (b) *L. boulandi* males.



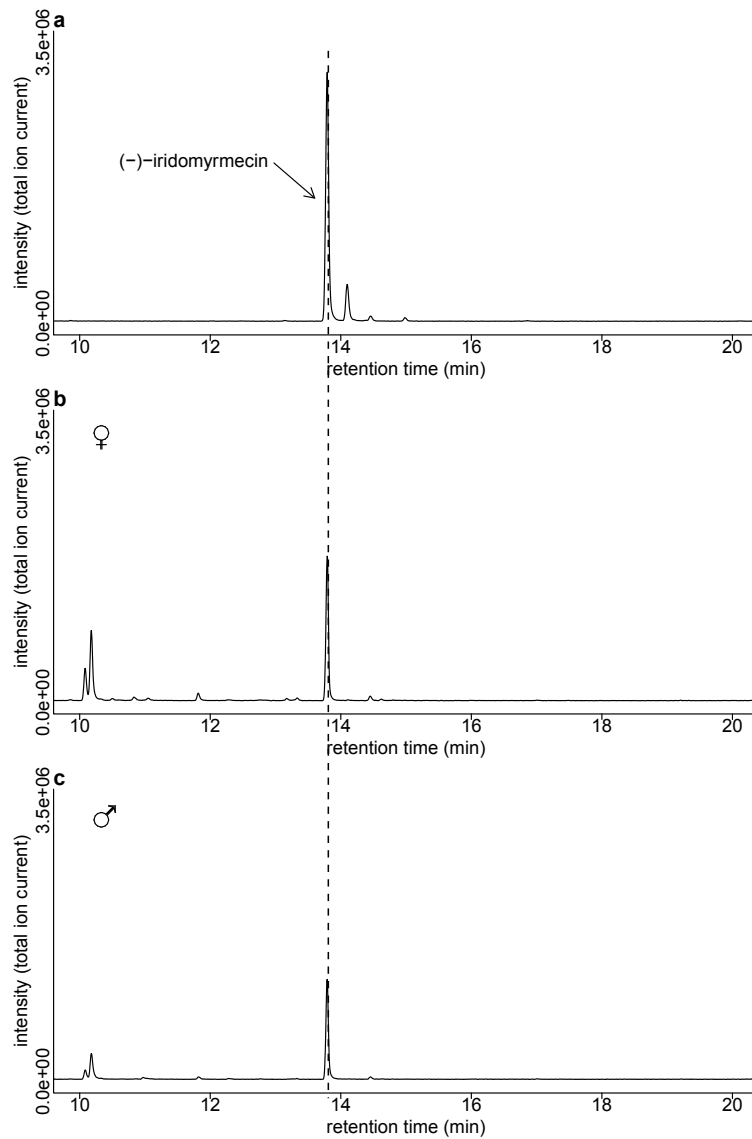

**Supplementary Figure S9: Identification of (-)-iridomyrmecin in *L. bouleardi*.** Total ion current chromatogram on a non-polar column of (a) synthetic (-)-iridomyrmecin, (b) the iridoid fraction of *L. bouleardi* female extract and (c) the iridoid fraction of *L. bouleardi* male extract.

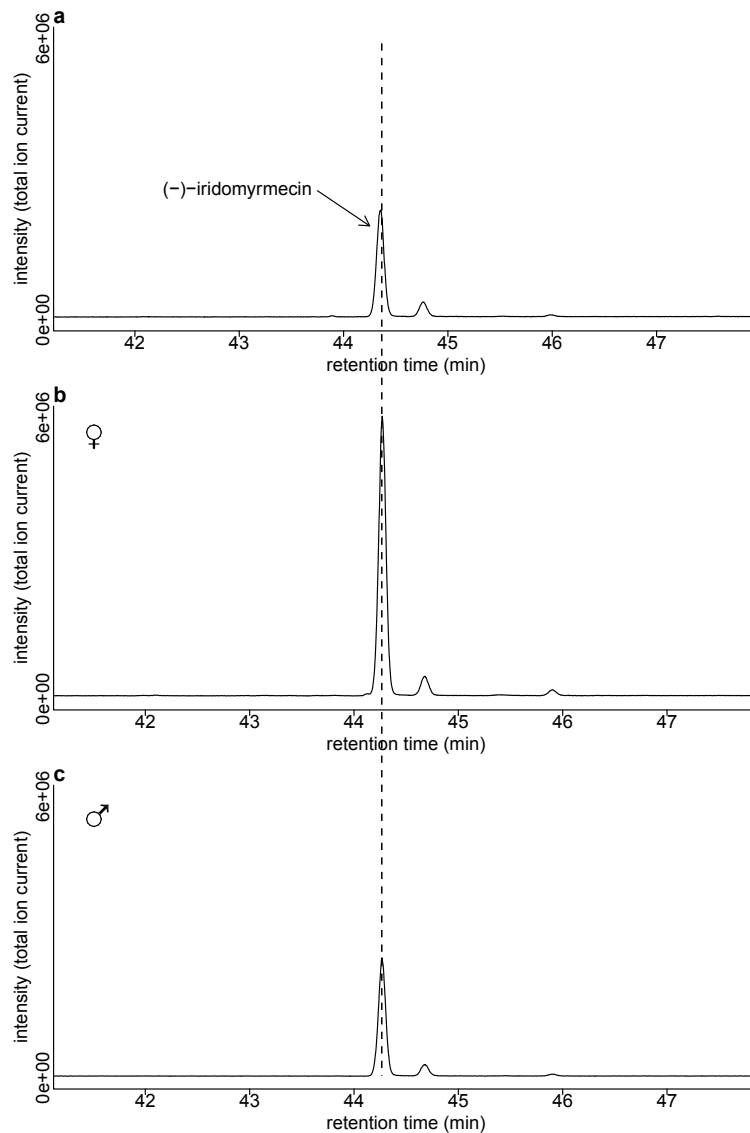

**Supplementary Figure S10: Identification of (-)-iridomyrmecin in *L. boucardi*.** Total ion current chromatogram on a polar (RH-WAX) column of (a) synthetic (-)-iridomyrmecin, (b) the iridoid fraction of *L. boucardi* female extract and (c) the iridoid fraction of *L. boucardi* male extract, both (b) and (c) coinjected with synthetic (-)-iridomyrmecin.

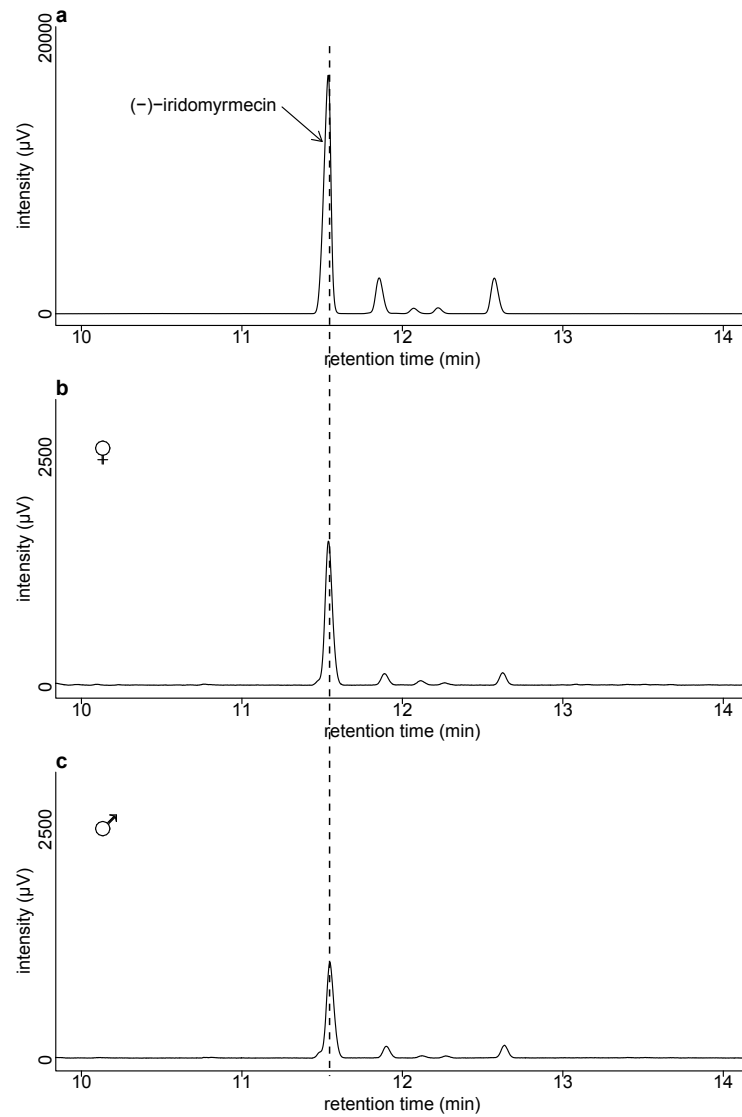

**Supplementary Figure S11: Identification of (-)-iridomyrmecin in *L. bouleari*.** Total ion current chromatogram on a cyclodextrin (Beta DEX 225) column of (a) synthetic (-)-iridomyrmecin, (b) the iridoid fraction of *L. bouleari* female extract and (c) the iridoid fraction of *L. bouleari* male extract, both (b) and (c) coinjected with synthetic (-)-iridomyrmecin.

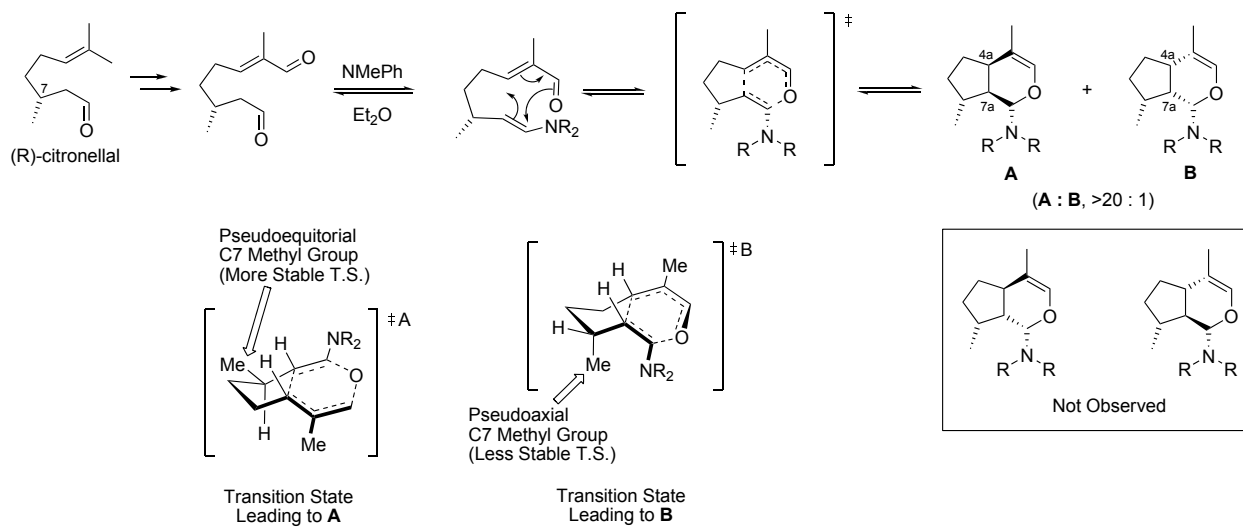

**Supplementary Figure S12: Stereochemical analysis of the Diels-Alder reaction.** The putative mechanism of the Diels-Alder cycloaddition employed in the synthesis of (-)-iridomyrmecin and (+)-isoiridomyrmecin suggests that the formation of two cycloadducts, **A** (major) and **B** (minor), is likely.

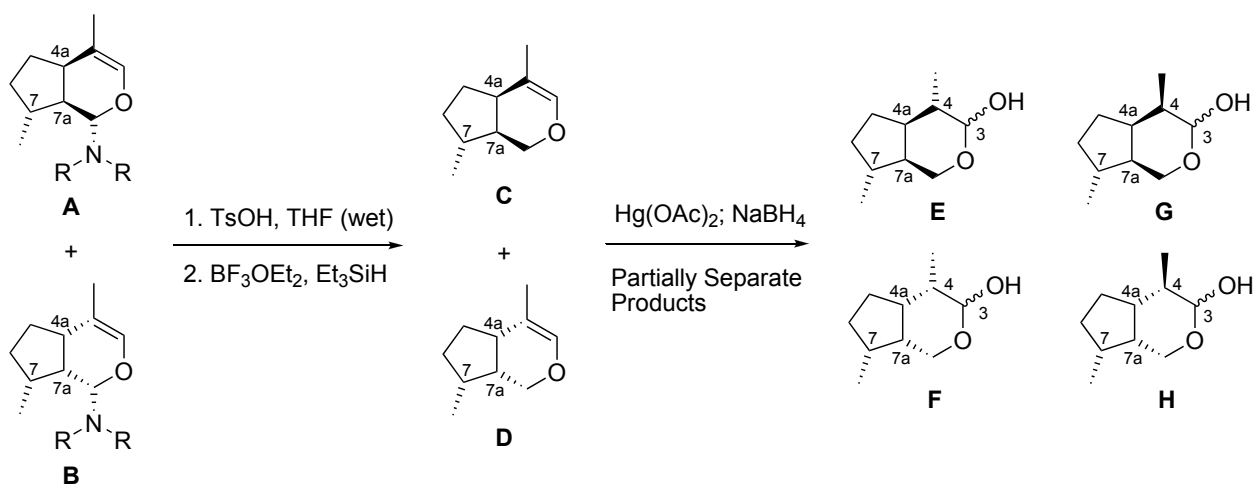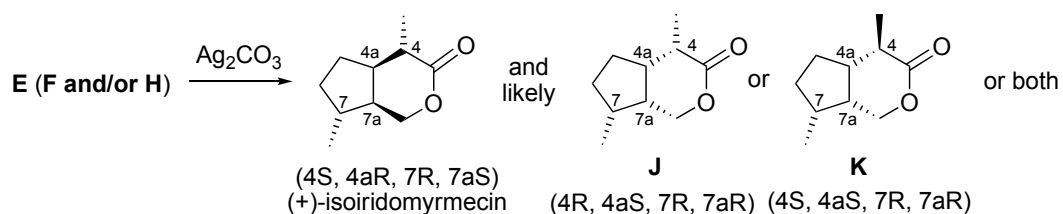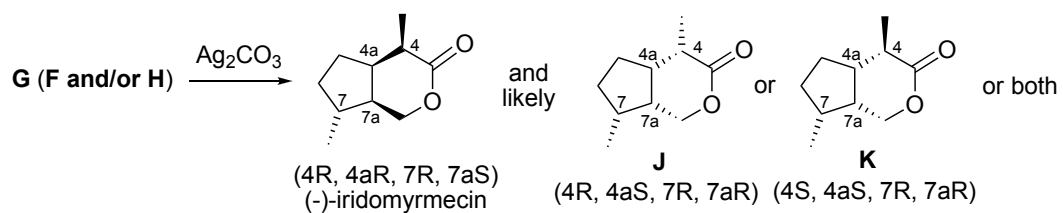

**Supplementary Figure S13: J and K are likely impurities in the authentic standard of (-)-iridomyrmecin.** The nonselective introduction of the C4 stereocenter late in the synthesis of the authentic standard would ultimately provide two possible side products, **J** and **K**, either or both of these products could be a minor component of the authentic standard of (-)-iridomyrmecin.

**Supplementary Table S1: Species specificity of mate recognition.** Test statistics for pairwise Mann-Whitney U-tests of wing fanning duration from the mate recognition experiment (Fig. 6b). P-values (rounded to third decimal) were corrected using the Bonferroni-Holm method. Uncorrected P-values (rounded to third decimal) are given in parentheses. For each experiment n = 12.

|                                                 | <i>L. heterotoma</i> iridoids<br>(DCM fraction) | <i>L. bouleari</i> iridoids<br>(DCM fraction) | synth.<br>(-)-iridomyrmecin | DCM    |
|-------------------------------------------------|-------------------------------------------------|-----------------------------------------------|-----------------------------|--------|
| <i>L. heterotoma</i> iridoids<br>(DCM fraction) | -                                               | U=80                                          | U=63.5                      | U=28.5 |
| <i>L. bouleari</i> iridoids<br>(DCM fraction)   | P=0.005 (P=0.001)                               | -                                             | U=176.5                     | U=103  |
| synth.<br>(-)-iridomyrmecin                     | P=0.001 (P<0.001)                               | P=0.529 (P=0.529)                             | -                           | U=112  |
| DCM                                             | P<0.001 (P<0.001)                               | P=0.016 (P=0.005)                             | P=0.021 (P=0.011)           | -      |

**Supplementary Table S2: Behavioural assays.** y-tube experiments conducted to identify the competition avoidance agent (1.A-1.I) and the female sex pheromone (2.A-2.I and 2S.A-2S.E) in *L. heterotoma*.

| experiment                                         | test arm                                                                         | control arm             | responding individual             |
|----------------------------------------------------|----------------------------------------------------------------------------------|-------------------------|-----------------------------------|
| Identification of the competition avoidance agent. |                                                                                  |                         |                                   |
| 1.A                                                | host patch                                                                       | empty Erlenmeyer flask  | <i>L. heterotoma</i> mated female |
| 1.B                                                | host patch with 5 mated <i>L. heterotoma</i> females                             | host patch              | <i>L. heterotoma</i> mated female |
| 1.C                                                | host patch with 5 mated <i>L. bouleari</i> females                               | host patch              | <i>L. heterotoma</i> mated female |
| 1.D                                                | female extract                                                                   | solvent                 | <i>L. heterotoma</i> mated female |
| 1.E                                                | host patch plus extract of virgin <i>L. heterotoma</i> females                   | host patch plus solvent | <i>L. heterotoma</i> mated female |
| 1.F                                                | host patch plus CHC fraction of female extract                                   | host patch plus solvent | <i>L. heterotoma</i> mated female |
| 1.G                                                | host patch plus iridoid fraction of female extract                               | host patch plus solvent | <i>L. heterotoma</i> mated female |
| 1.H                                                | host patch plus synthetic (-)-iridomyrmecin                                      | host patch plus solvent | <i>L. heterotoma</i> mated female |
| 1.I                                                | host patch plus synthetic (+)-isoiridomyrmecin                                   | host patch plus solvent | <i>L. heterotoma</i> mated female |
| Identification of the female sex pheromone.        |                                                                                  |                         |                                   |
| 2.A                                                | 10 virgin <i>L. heterotoma</i> females in Erlenmeyer flask                       | empty Erlenmeyer flask  | <i>L. heterotoma</i> virgin male  |
| 2.B                                                | extract of virgin <i>L. heterotoma</i> females                                   | solvent                 | <i>L. heterotoma</i> virgin male  |
| 2.C                                                | CHC fraction of female extract                                                   | solvent                 | <i>L. heterotoma</i> virgin male  |
| 2.D                                                | iridoid fraction of female extract                                               | solvent                 | <i>L. heterotoma</i> virgin male  |
| 2.E                                                | synthetic (-)-iridomyrmecin and synth. (+)-isoiridomyrmecin                      | solvent                 | <i>L. heterotoma</i> virgin male  |
| 2.F                                                | iridoid fraction of female extract, p5 (= (-)-iridomyrmecin) removed             | solvent                 | <i>L. heterotoma</i> virgin male  |
| 2.G                                                | iridoid fraction of female extract, p5 replaced with synthetic (-)-iridomyrmecin | solvent                 | <i>L. heterotoma</i> virgin male  |
| 2.H                                                | iridoid fraction of female extract, p5 replaced with synthetic (+)-iridomyrmecin | solvent                 | <i>L. heterotoma</i> virgin male  |
| 2.I                                                | extract of virgin <i>L. bouleari</i> females                                     | solvent                 | <i>L. heterotoma</i> virgin male  |
| 2S.A                                               | iridoid fraction of female extract. p4 removed                                   | solvent                 | <i>L. heterotoma</i> virgin male  |
| 2S.B                                               | iridoid fraction of female extract. p1, p2, p3 and p4 removed                    | solvent                 | <i>L. heterotoma</i> virgin male  |
| 2S.C                                               | iridoid fraction of female extract, p6 (= (+)-isoiridomyrmecin) and p4 removed   | solvent                 | <i>L. heterotoma</i> virgin male  |
| 2S.D                                               | iridoid fraction of female extract, p7 and p6 removed                            | solvent                 | <i>L. heterotoma</i> virgin male  |
| 2S.E                                               | iridoid fraction of female extract, p3 and p4 removed                            | solvent                 | <i>L. heterotoma</i> virgin male  |
